# Supplementary material for: Comprehensive Estimation of Changes in the Microgeometry of Steel 45 by Ultrasonic Plastic Deformation with a Free Deforming Element
Source: MDPI journal article supplement (doi:10.3390/met13010114), 2023-01-06

Profilograms obtained in the study of the influence of the pressing force on the roughness parameters

Table S1:  $F_N=0N$

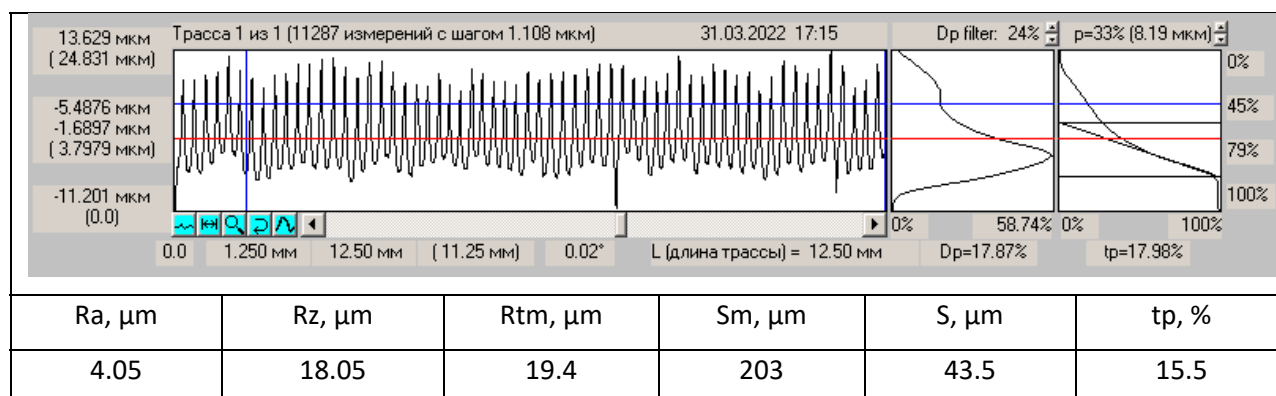

Table S2:  $F_N=5N$

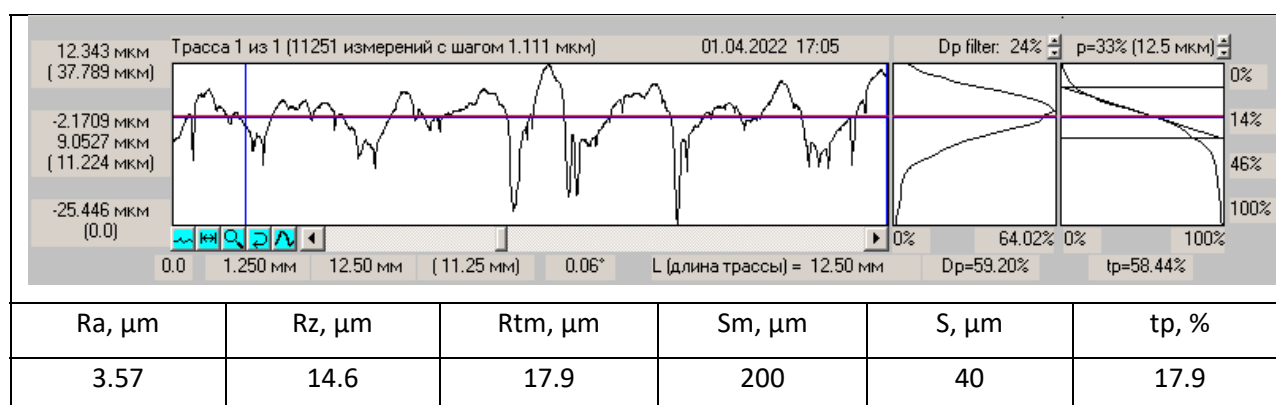

Table S3:  $F_N=55N$

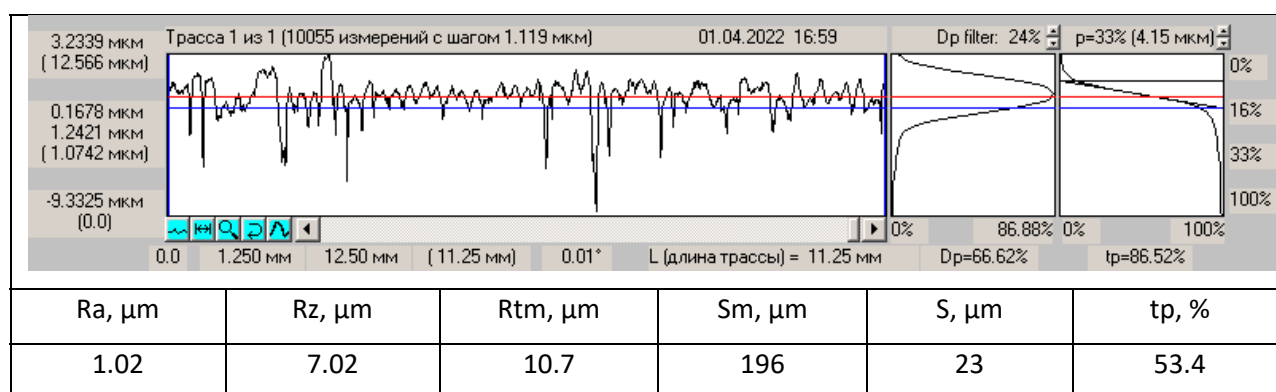

Table S4:  $F_N=105N$ 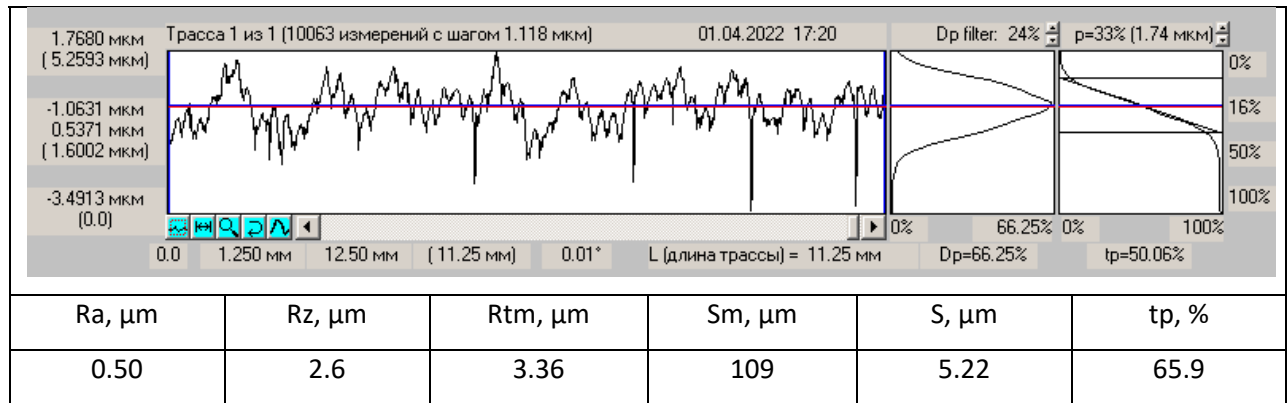Table S5:  $F_N=155N$ 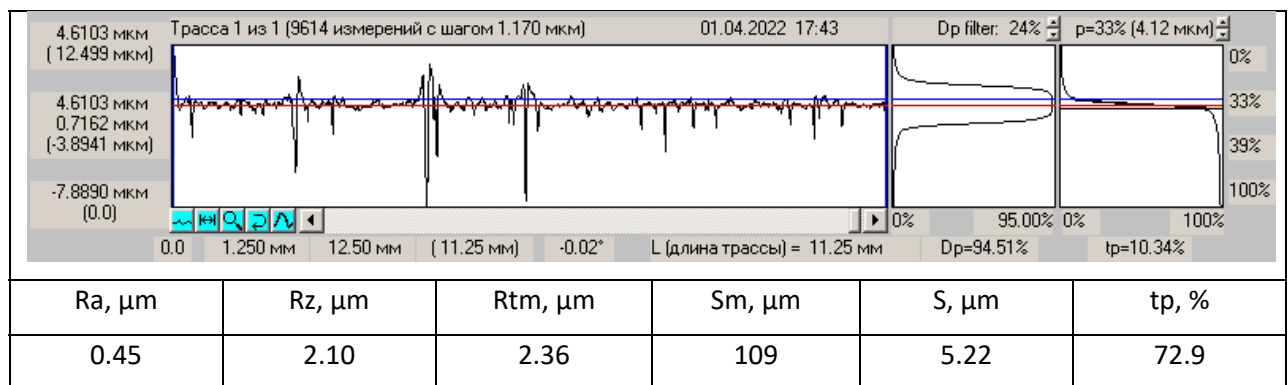Table S6:  $F_N=205N$ 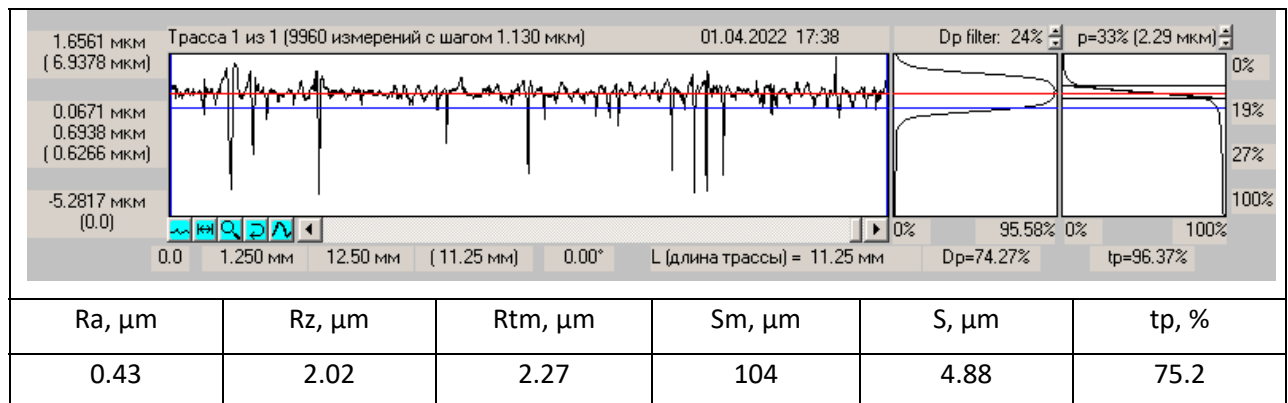

Supplement: s1 [file s1]
